# Supplementary material
Source: PubMed Central journal article supplement (PMC4996364)

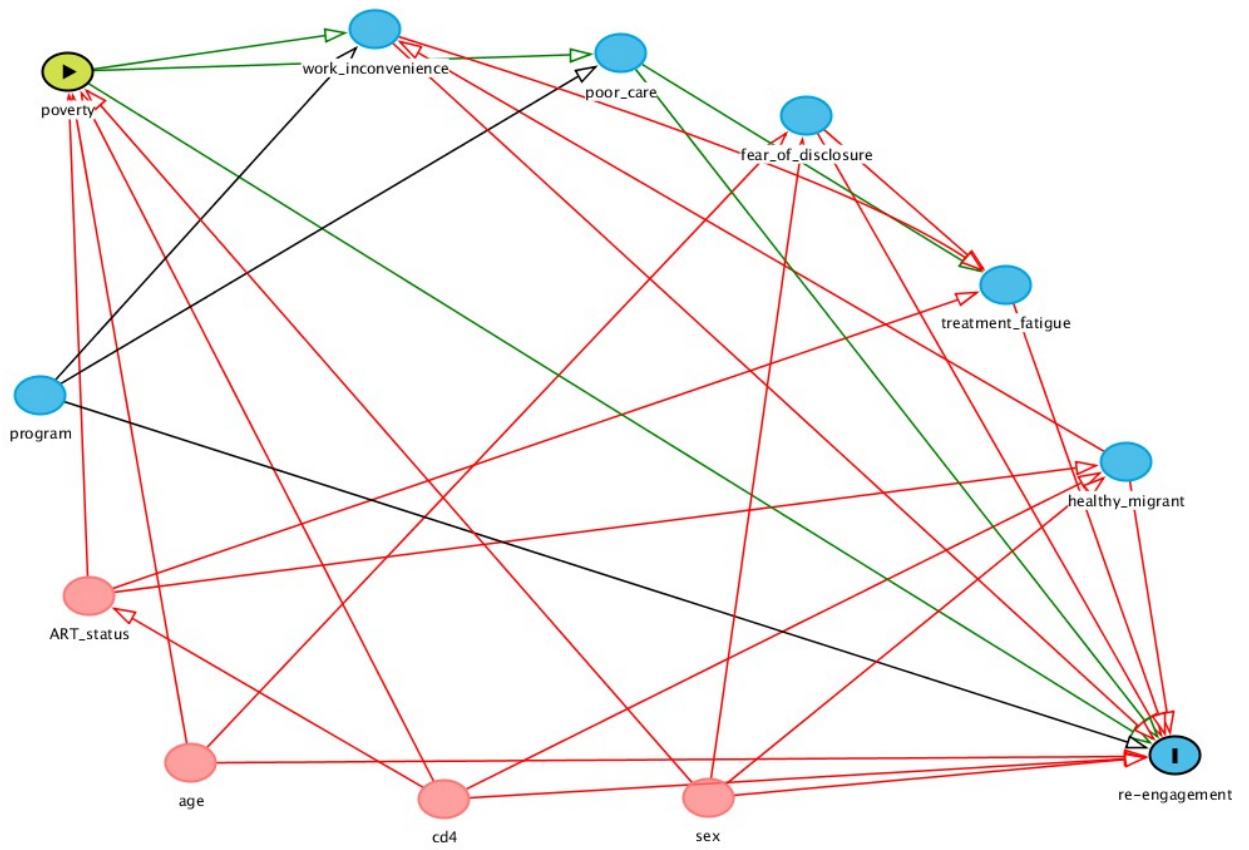

Supplement: NIHMS809178-supplement-Figure.pdf [file NIHMS809178-supplement-Figure.pdf]
